# Supplementary material
Source: publisher figshare collection journal article supplement (https://tandf.figshare.com/articles/dataset/_/5339980)
Supplement: Supplementary file 1 [file cavp_a_1362497_sm7245.doc]

Supplementary table

| **Supplementary table 1. Sequences of MDV reference strains published in GenBank used for (Meq, pp38, gL, and VIL-8) genes.** | | | |
| --- | --- | --- | --- |
| MDV Strain | Virulence | Origin | Gene Bank Accession number |
| Egypt_1 | vv MDV | Egypt | JX467678(M),JX533445(L) |
| Egypt_2 | vv MDV | Egypt | JX467679(M),JX533446(L) |
| Egypt_3 | vv MDV | Egypt | JX467680(M),JX533447(L) |
| Egypt_4 | vv MDV | Egypt | KC161220(M) |
| Egypt_5 | vv MDV | Egypt | KC161221(M) |
| OkiH26035 | N.A. | Japan | LC137000.1 (M) |
| Tokachi-p1 | N.A. | Japan | AB638843.1(M) |
| Tokachi-w1 | N.A. | Japan | AB638846.1(M) |
| Tokachi-s2 | N.A. | Japan | AB638845.1(M) |
| Tokachi-s1 | N.A. | Japan | AB638844.1(M) |
| Tokachi-m2 | N.A. | Japan | AB638842.1(M) |
| Tokachi-m1 | N.A. | Japan | AB638841.1(M) |
| OkiH26070 | N.A. | Japan | LC137001.1(M) |
| GX070079 | vv MDV | China | EU427303.1(M) |
| GX0101 | vv MDV | China | JX844666.1(M, p) |
| 814 | mMDV(vaccine) | China | GU354326 (M,V) |
| 617A | vv MDV | USA | AY362712.1 (M) |
| 571-2004 | v MDV | USA | AY362710.1 (M) |
| GXYL1 | N.A. | China | HQ290415.1 (M) |
| LLY | N.A. | China | HQ658621.1(M) |
| G2 | vvMDV | China | AF493556.1(M) |
| GX070060 | vv MDV | China | EU427303.1(M) |
| LTS | vvMDV | China | HQ638174.1(M) |
| SD2012-1 | v MDV | China | [KC511813.1](https://www.ncbi.nlm.nih.gov/nucleotide/458598619?report=genbank&log$=nucltop&blast_rank=31&RID=)(M, P) |
| WS04 | vvMDV | China | HQ638173(P) |
| 3004 | Mmdv, vaccine | Russia | EU032468.1(M) |
| WS03 | vvMDV | China | HQ638172(P) |
| TQ20 | vvMDV | China | HQ638151(M), HQ638171(P) |
| MS53 | vvMDV | China | HQ638165(P) |
| MS01 | vvMDV | China | HQ638164(P), HQ638184(V) |
| YA | vvMDV | China | HQ638196(V) |
| GA | vMDV | USA | AF065430(V),AF147806(M, P),U04994.1(L) |
| LS | vv MDV | China | HQ638163(P), HQ638183(V) |
| BY | vvMDV | China | HQ638159(P), HQ638179(V) |
| YY | vvMDV | China | HQ638177(P), HQ638197(V) |
| DY01 | vvMDV | China | HQ638180(V) |
| DY04 | vvMDV | China | HQ638161(P) |
| 5079 | vvMDV | China | HQ638140(M), HQ638158(P) |
| MS67 | vvMDV | China | HQ638167(P) |
| Md5 | vvMDV, | USA | AF243438.1 (V, P) , AF243438.1 (L) |
| RB1B | vvMDV, | USA | EF523390(M, V, P) AY129996.1 (L) |
| CV1988 | mMDV, Vaccine | Netherlands | DQ530348.1 (M, V, P), S76060.1 |
| CU-2 | mMDV | USA | EU499381(M, V, P) AY362708.1 (M), EU499381.1 (L) |
| 584A | vv+MDV | USA | AY129995.1 (P) |
| XJ03 | v MDV | China | HQ638195(V) |
| LMS | vvMDV | China | JQ314003.1 (L, V, P) |
| C12_130 | vvMDV | USA | FJ436096.1 (L) |
| 648A | vv+MDV | USA | AY362725.1 (M) |
| N | vv+MDV | USA | AY129992.1 (L) , AY362718.1 (M) |
| 584a | vv+MDV | USA | DQ534532.1 (M), AY129995.1(L),DQ534532.1 (V) |
| X | vv+MDV | USA | AY129990.1 (L) |
| Ind/TN11/01 | v MDV | India | KP644421.1(V) |
| Ind/KA12/02 | vv MDV | India | KP342382.1 (P) |
| Ind/TN12/03 | v MDV | India | KP342380.1 (P) |
| Ind/TN12/07 | v MDV | India | FJ620907.1 (P) |
| W | vv+MDV | USA | AY130002.1 (L) |
| L | vv+MDV | USA | AY130000.1 (L) |
| TK | vv+MDV | USA | AY129998.1 (L) |
| U | vv+MDV | USA | AY130001.1 (L) |
| 648a | N.A. | USA | JQ809691.1 (V, P) |
| 595 | vvMDV | USA | AY362715 (M) |
| MS57 | v MDV | China | HQ638166.1 (V) |
| RK-1 | vv+MDV | USA | AF489277.1 (V) |
| R2/23 | N.A. | USA | DQ534540.1 (V) |
| QD2014 | vvMDV | China | KP144358.1(V) |
| TQ12 | vvMDV | China | HQ638170.1 (p), HQ638190.1 (V) |
| rMd5 | vvMDV | USA | AF243438.1(p) |
| J-1 | vvMDV | China | HQ638162.1 (p) |
| vvMDV = very virulent MDV, vv+MDV= very virulent–plus MDV, vMDV =virulent MDV, mMDV = mildly virulent MDV. (M )=accession number of Meq gene; (L) = accession number of gL gene; (P) = accession number of PP38 gene; (V) =accession number of vIL-8 gene; NA=not available | | | |
